# Supplementary material for: Combined BET bromodomain and CDK2 inhibition in MYC-driven medulloblastoma
Source: PubMed Central journal article supplement (PMC5966365; doi:10.1038/s41388-018-0135-1), 2018-03-07

# Supplementary Figure 1

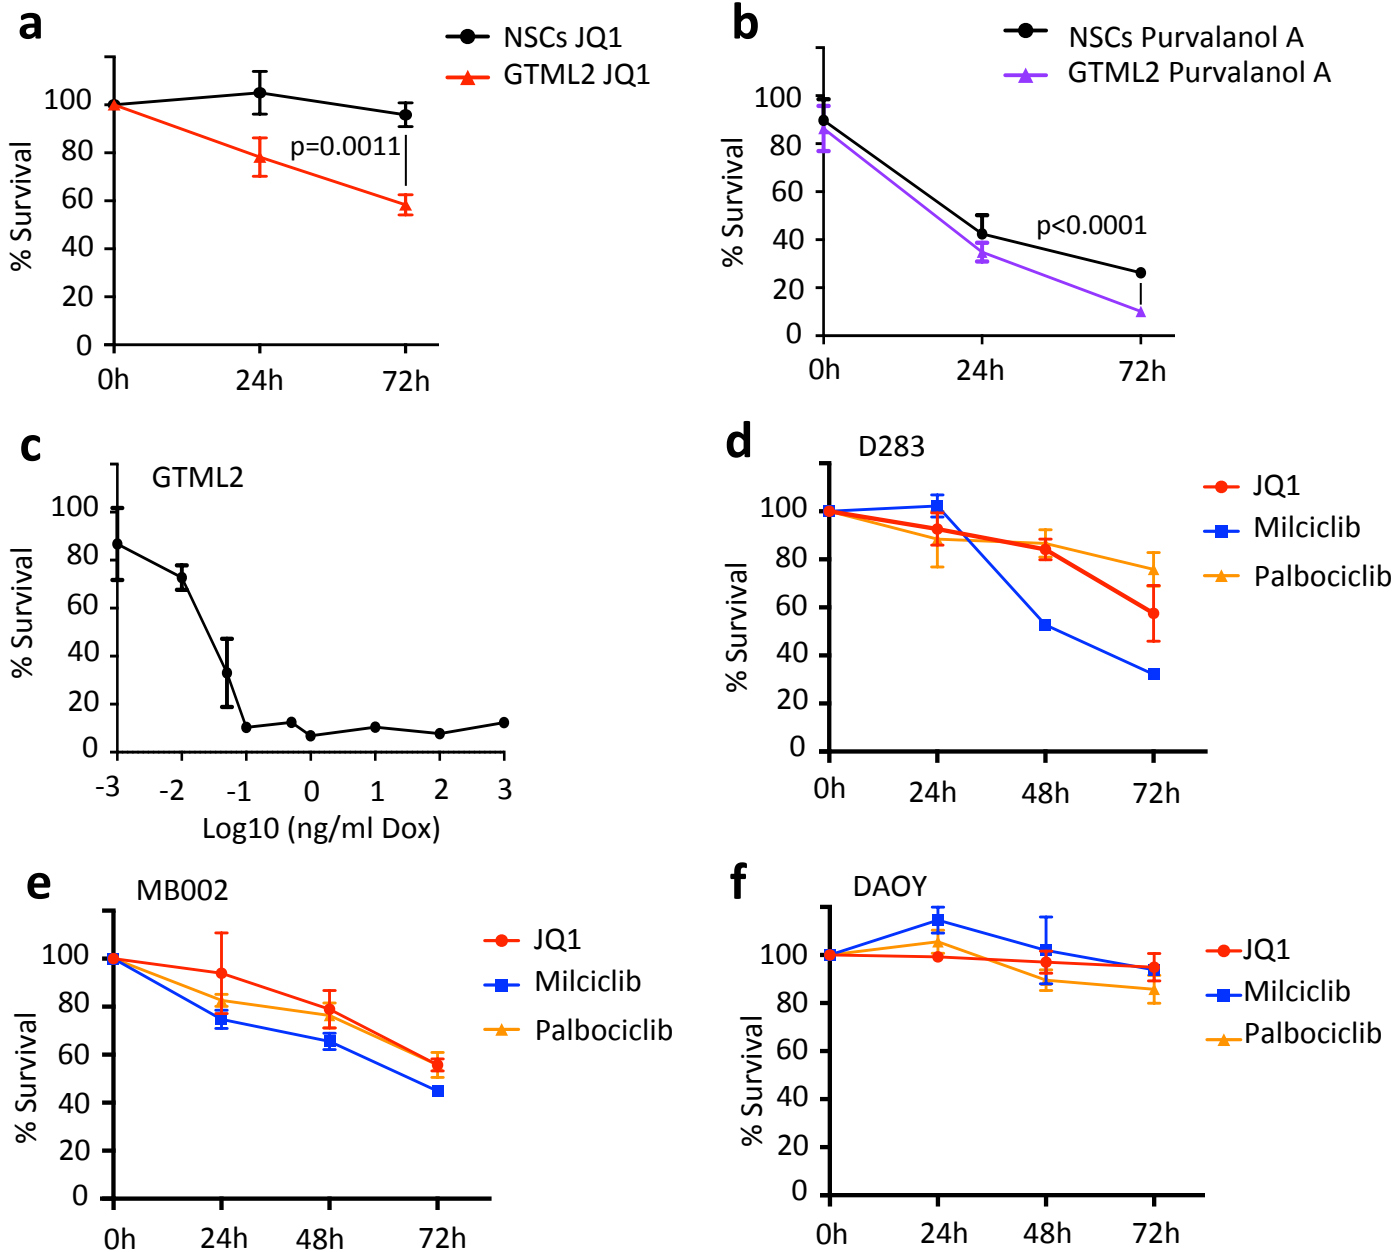

Supplement: 41388_2018_135_MOESM1_ESM.pdf [file 41388_2018_135_MOESM1_ESM.pdf]
