# Supplementary material for: Combined BET bromodomain and CDK2 inhibition in MYC-driven medulloblastoma
Source: PubMed Central journal article supplement (PMC5966365; doi:10.1038/s41388-018-0135-1), 2018-03-07

# Supplementary Figure 6

**a**

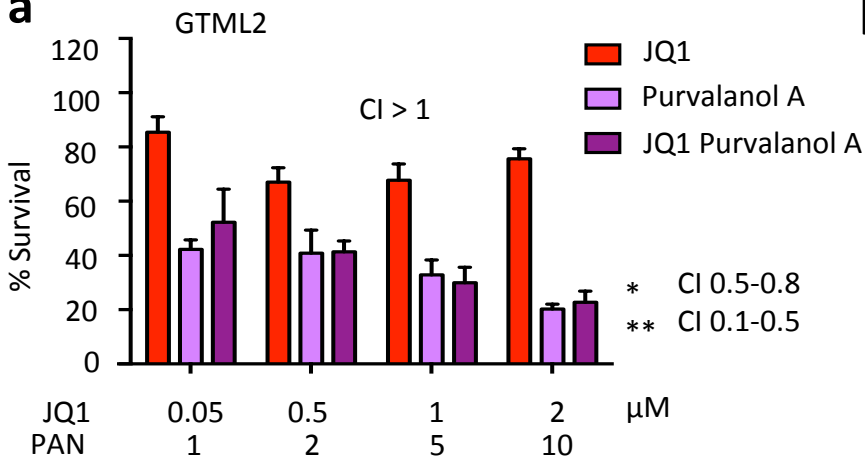

**b**

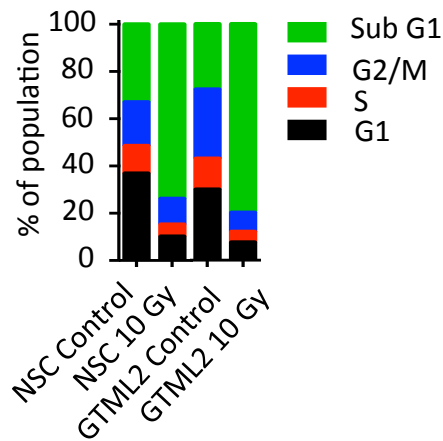

**c**

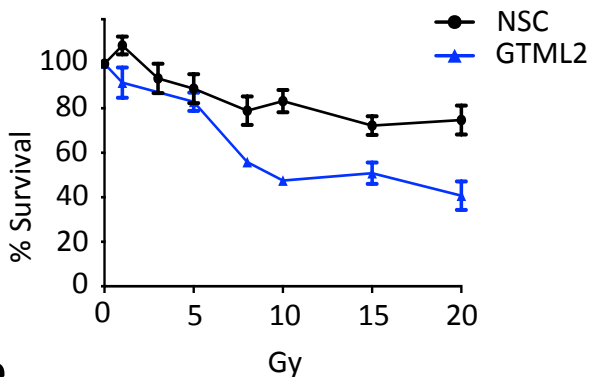

**d**

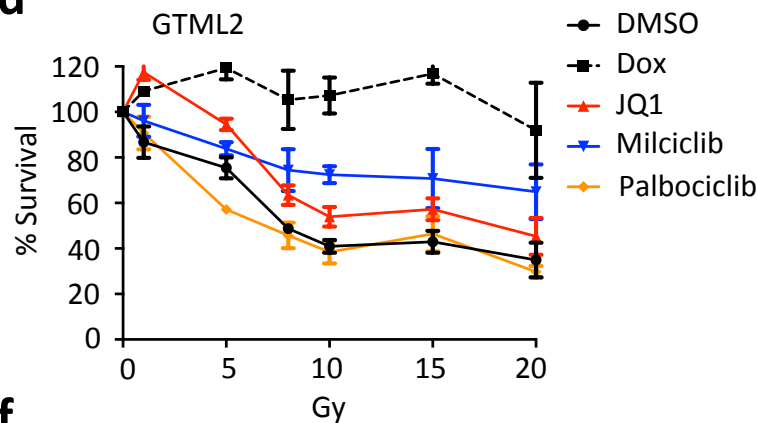

**e**

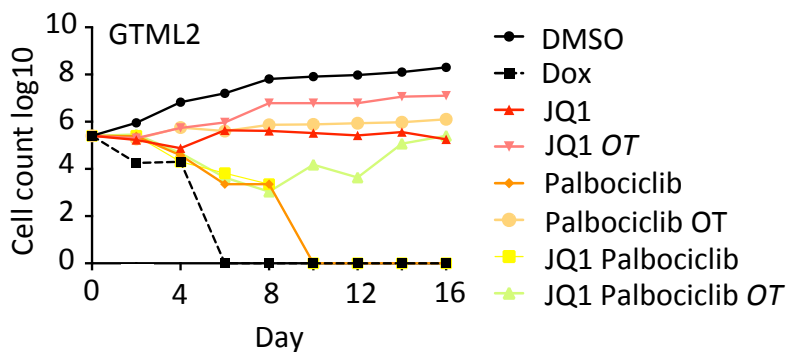

**f**

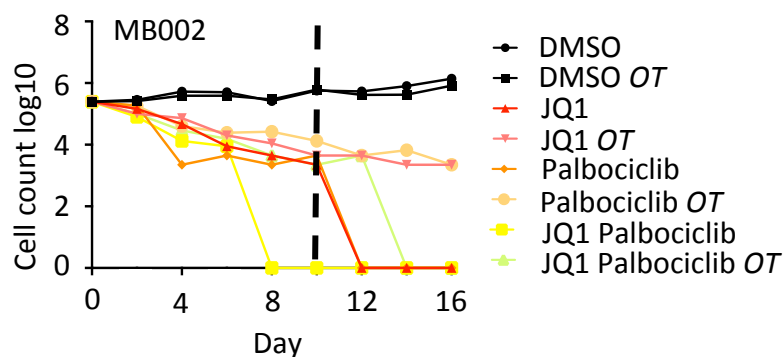

Supplement: 41388_2018_135_MOESM6_ESM.pdf [file 41388_2018_135_MOESM6_ESM.pdf]
